# Supplementary material for: Listening to People with Misophonia: Exploring the Multiple Dimensions of Sound Intolerance Using a New Psychometric Tool, the S-Five, in a Large Sample of Individuals Identifying with the Condition
Source: MDPI journal article supplement (doi:10.3390/psych3040041), 2021-10-28
Supplement: s1 [file s1]

## Supplementary material

**Table S1.** Reported diagnoses (multiple diagnoses selections were allowed-not mutually exclusive).

| <b>Disorder</b>                                        | <b>N</b> | <b>%</b> |
|--------------------------------------------------------|----------|----------|
| Depression                                             | 282      | 34.06    |
| Generalized anxiety disorder                           | 277      | 33.45    |
| Skin Picking                                           | 90       | 10.87    |
| Tinnitus                                               | 80       | 9.66     |
| Social anxiety disorder                                | 77       | 9.30     |
| Obsessive-Compulsive Disorder (OCD)                    | 67       | 8.09     |
| Panic Disorder                                         | 37       | 4.47     |
| Do you have a diagnosis of a substance abuse disorder? | 34       | 4.11     |
| Attention deficit disorder (ADD)                       | 30       | 3.62     |
| Attention deficit hyperactivity disorder (ADHD)        | 28       | 3.38     |
| Autism spectrum disorder (ASD)                         | 25       | 3.02     |
| Binge eating disorder                                  | 25       | 3.02     |
| Bipolar disorder                                       | 22       | 2.66     |
| Persistent depressive disorder (dysthymia)             | 22       | 2.66     |
| Dyslexia                                               | 21       | 2.54     |
| Hyperacusis                                            | 20       | 2.42     |
| Borderline personality disorder                        | 17       | 2.05     |
| Anorexia nervosa                                       | 16       | 1.93     |
| Bulimia                                                | 15       | 1.81     |
| Trichotillomania (hair pulling)                        | 15       | 1.81     |
| Obsessive-compulsive personality disorder              | 13       | 1.57     |
| Auditory processing disorder                           | 10       | 1.21     |
| Dyspraxia/developmental coordination disorder          | 6        | 0.72     |
| Antisocial personality disorder                        | 5        | 0.60     |
| Narcissistic personality disorder                      | 1        | 0.12     |

**Table S2.** Descriptive indices of measures-complete sample.

| <b>Scale</b>                           | <b>N</b> | <b>Mean<br/>(SD)</b> | <b>Mode<br/>(min-max)</b> | <b>Median<br/>(Q1-Q3)</b> |
|----------------------------------------|----------|----------------------|---------------------------|---------------------------|
| A-MISO-S total score                   | 737      | 9.1 (6.3)            | 0 (0 - 26)                | 8 (4 - 14)                |
| GAD7 total score                       | 1582     | 6.9 (5.8)            | 0 (0 - 21)                | 6 (2 - 11)                |
| MQ: Misophonia Symptom Scale           | 576      | 14.9 (6.9)           | 13 (0 - 32)               | 15 (10 - 20)              |
| MQ: Misophonia Emotions and Behaviours | 567      | 17.1 (9.7)           | 19 (0 - 41)               | 18 (9 - 25)               |
| MQ: Misophonia Severity                | 696      | 5.1 (3.5)            | 4a (0 - 15)               | 5 (2 - 7)                 |
| MQ total                               | 576      | 31.7 (15.4)          | 34 (0 - 65)               | 33 (19 - 45)              |
| PHQ9 total score                       | 1561     | 8.1 (6.4)            | 0 (0 - 27)                | 7 (3 - 12)                |
| WSAS total score                       | 831      | 15.7 (9)             | 18 (0 - 40)               | 16 (9 - 22)               |
